# Supplementary material
Source: PubMed Central journal article supplement (PMC3800475)

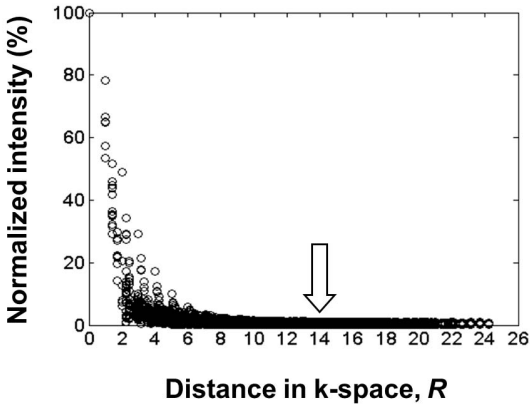

**Number of voxels**

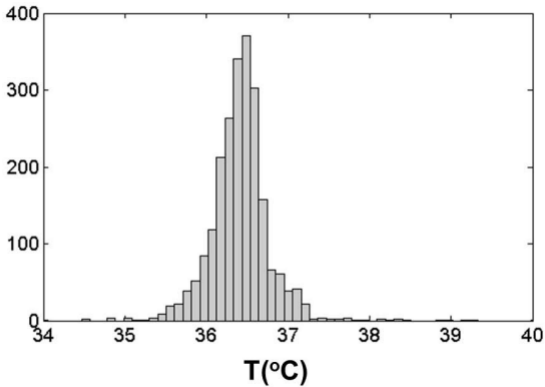

Supplement: NIHMS499741-supplement-Supp_Fig_S1-S2.pdf [file NIHMS499741-supplement-Supp_Fig_S1-S2.pdf]
